# Supplementary material for: A pilot dose finding study of pioglitazone in autistic children
Source: PubMed Central journal article supplement (PMC6258310; doi:10.1186/s13229-018-0241-5), 2018-11-26

**A**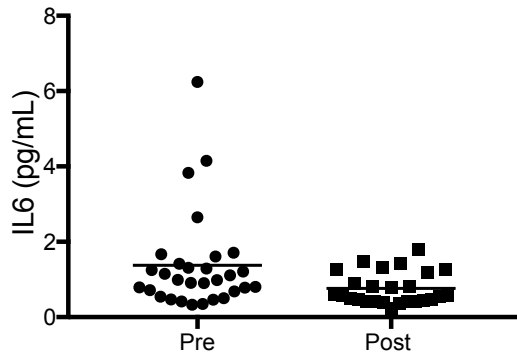**B**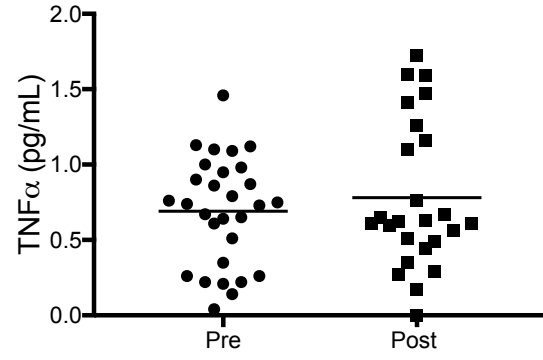**C**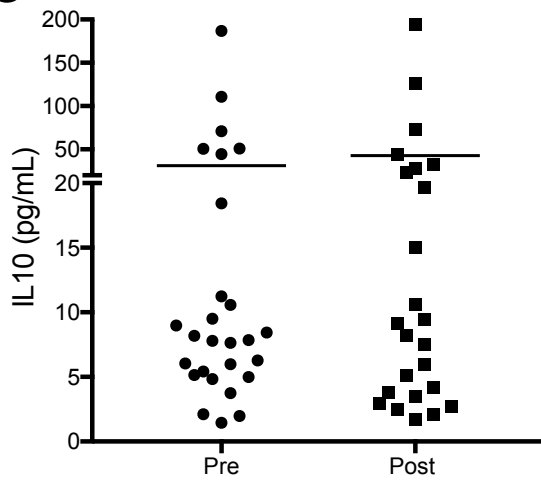**D**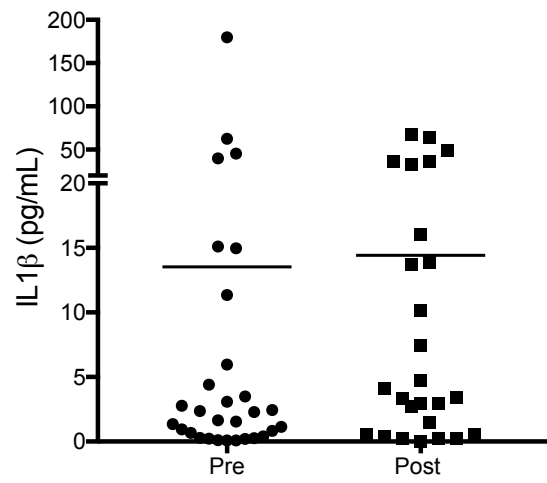

Supplement: 13229_2018_241_MOESM2_ESM.pdf [file 13229_2018_241_MOESM2_ESM.pdf]
